# Supplementary material for: Assessing the Operational Feasibility of Integrating Point-of-Care G6PD Testing into Plasmodium vivax Malaria Management in Vietnam
Source: MDPI journal article supplement (doi:10.3390/pathogens12050689), 2023-05-08
Supplement: s1 [file s1]

## Supplemental Tables

1. All participants tested multiple times with STANDARD G6PD Test
2. Costing table:

**Supplemental Table 1. All participants tested multiple times with the STANDARD G6PD Test**

| ID                   | Province   | District hospital/<br>commune health station | Age | Sex  | G6PD test results |          |          | Reason for multiple tests                            | G6PD level |
|----------------------|------------|----------------------------------------------|-----|------|-------------------|----------|----------|------------------------------------------------------|------------|
|                      |            |                                              |     |      | 1st time          | 2nd time | 3rd time |                                                      |            |
| 536                  | Binh Phuoc | Đắk Ô <sup>b</sup>                           | 33  | Male | 6.9               | 7.3      | 1.9      | 1st and 2nd time: control mode                       | Deficient  |
| 677                  | Binh Phuoc | Đắk Ô <sup>b</sup>                           | 20  | Male | 7.5               | 0.1      | 2.3      | 1st time: control mode, 2nd time: to ensure accuracy | Deficient  |
| 693                  | Binh Phuoc | Đắk Ô <sup>b</sup>                           | 21  | Male | 8.3               | 8.5      | -        | 1st time: control mode                               | Normal     |
| 107                  | Binh Phuoc | Đắk Ô <sup>b</sup>                           | 32  | Male | 9.2               | 0.1      | -        | 1st time: control mode                               | Deficient  |
| 290                  | Binh Phuoc | Đắk Ô <sup>b</sup>                           | 34  | Male | 8.6               | 4.6      | -        | 1st time: control mode                               | Normal     |
| 302                  | Binh Phuoc | Đắk Ô <sup>b</sup>                           | 45  | Male | 7.9               | 0.1      | -        | 1st time: control mode                               | Deficient  |
| BGM/<br>G6PD<br>/001 | Binh Phuoc | Bu Gia Map <sup>b</sup>                      | 14  | Male | 1.4               | 0.9      |          | to ensure the result accuracy                        | Deficient  |
| BGM/<br>G6PD<br>/002 | Binh Phuoc | Bu Gia Map <sup>b</sup>                      | 9   | Male | 1.6               | 1.1      |          | to ensure the result accuracy                        | Deficient  |

### Costing Tables:

Using Global Fund procurement prices for G6PD diagnostic commodities the annualized cost of the training-of the trainers is estimated to be \$1,143. The G6PD analyzers are assumed to be kept at the malaria institute and not used for routine case management, therefore their costs are included in the total training costs. The cost of the G6PD analyzer was amortized over 5 years, an estimate of the lifespan of the analyzer. All other costs are amortized over 2 years, an estimate of the training-of-trainer frequency. Other costs included in the training-of-trainer analysis were gloves, swabs, batteries, lunch, and a tea break.

**Supplemental Table 2. Total cost of training on G6PD testing for the training-of-trainers**

| Item                                                                                                                 | Unit               | Amount<br>(supplies/<br>people) | Using study G6PD<br>commodity procurement<br>prices |                     | Using likely Global Fund<br>G6PD commodity<br>procurement prices |                     |
|----------------------------------------------------------------------------------------------------------------------|--------------------|---------------------------------|-----------------------------------------------------|---------------------|------------------------------------------------------------------|---------------------|
|                                                                                                                      |                    |                                 | Price per<br>unit<br>(USD)                          | Total cost<br>(USD) | Price per<br>unit (USD)                                          | Total cost<br>(USD) |
| Number of staff                                                                                                      | Person             | 17                              |                                                     |                     |                                                                  |                     |
| G6PD analyzers                                                                                                       | analyzer           | 5                               | 480.10                                              | 2,401.00            | 406.00                                                           | 2,030               |
| G6PD test<br>devices                                                                                                 | Devices            | 3                               | 120.04                                              | 360.00              | 101.50                                                           | 305.00              |
| G6PD test<br>controls                                                                                                | Box of<br>controls | 3                               | 41.00                                               | 123.00              | 40.60                                                            | 122.00              |
| Batteries                                                                                                            | Box of 4<br>(AAA)  | 5                               | 0.52                                                | 3.00                | 0.52                                                             | 3.00                |
| Gloves                                                                                                               | box                | 1                               | 4.33                                                | 4.00                | 4.33                                                             | 4.00                |
| Swabs                                                                                                                | bag                | 1                               | 5.18                                                | 5.00                | 5.18                                                             | 5.00                |
| Alcohol                                                                                                              | Jar                | 1                               | 2.99                                                | 3.00                | 2.99                                                             | 3.00                |
| Lunch                                                                                                                | Per person         | 17                              | 8.66                                                | 147.00              | 8.66                                                             | 147.00              |
| Tea break                                                                                                            | Per person         | 17                              | 1.73                                                | 29.00               | 1.73                                                             | 29.00               |
| Training<br>materials for<br>trainees                                                                                | Per person         | 17                              | 2.17                                                | 37.00               | 2.17                                                             | 37.00               |
| Certificate<br>printing fee                                                                                          |                    | 17                              | 0.43                                                | 7.00                | 0.43                                                             | 7.00                |
| <b>Total cost per TOT training</b>                                                                                   |                    |                                 |                                                     | <b>3,120.00</b>     |                                                                  | <b>2,692.00</b>     |
| <b>Total cost annualized (assuming TOT training occurs<br/>every 2 years, and G6PD analyzer has 5-year lifespan)</b> |                    |                                 |                                                     | <b>1,320.00</b>     |                                                                  | <b>1,143.00</b>     |

**Supplemental Table 3. Total cost of training for G6PD testing for health workers at health facilities**

| Item                           | Unit   | Amount | Using study G6PD commodity procurement prices |                  | Using likely Global Fund G6PD commodity procurement prices |                  |
|--------------------------------|--------|--------|-----------------------------------------------|------------------|------------------------------------------------------------|------------------|
|                                |        |        | Price per unit/person (USD)                   | Total cost (USD) | Price per unit/person (USD)                                | Total cost (USD) |
| Both provinces (trainees = 36) |        |        |                                               |                  |                                                            |                  |
| Lunch                          | Person | 42     | 8.62                                          | 362.00           | 8.62                                                       | 362.00           |
| Tea break                      | Person | 42     | 1.72                                          | 72.00            | 1.72                                                       | 72.00            |

|                                                                             |                              |    |        |                 |        |                 |
|-----------------------------------------------------------------------------|------------------------------|----|--------|-----------------|--------|-----------------|
| Training materials                                                          | Set                          | 42 | 2.16   | 91.00           | 2.16   | 91.00           |
| Certificate printing fee                                                    | Sheet (of paper)             | 36 | 1.73   | 62.00           | 1.73   | 62.00           |
| Job aids                                                                    | Person                       | 18 | 4.31   | 78.00           | 4.31   | 78.00           |
| G6PD test devices                                                           | G6PD devices kit (25 pieces) | 7  | 120.04 | 840.00          | 101.50 | 711.00          |
| G6PD controls                                                               | Control kit (20 pieces)      | 8  | 41.00  | 328.00          | 40.60  | 325.00          |
| Gloves                                                                      | box                          | 3  | 2.88   | 9.00            | 2.88   | 9.00            |
| Swabs                                                                       | bag                          | 3  | 5.16   | 15.00           | 5.16   | 15.00           |
| Alcohol                                                                     | Jar                          | 3  | 2.97   | 9.00            | 2.97   | 9.00            |
| Trainer travel costs                                                        | person                       | 2  | 661.08 | 1,322.00        | 661.08 | 1,322.00        |
| Trainee travel costs                                                        | person                       | 18 | 4.31   | 78.00           | 4.31   | 78.00           |
| Trainer per diem                                                            | person                       | 2  | 126.09 | 252.00          | 126.09 | 252.00          |
| <b>Total cost</b>                                                           |                              |    |        | <b>3,518.00</b> |        | <b>3,385.00</b> |
| <b>Total cost annualized (training occurs every 2 years)</b>                |                              |    |        | <b>1,759.00</b> |        | <b>1,693.00</b> |
| <b>Total per health facility (n = 9) with 4 trainees - study training</b>   |                              |    |        | <b>195.00</b>   |        | <b>188.00</b>   |
| <b>Total per health facility (n = 9) with 2 trainees - routine training</b> |                              |    |        | <b>98.00</b>    |        | <b>94.00</b>    |
